# Supplementary material
Source: PubMed Central journal article supplement (PMC3912829)
Supplement: supp_141.4.842_DEV090449.pdf [file supp_141.4.842_DEV090449.pdf]

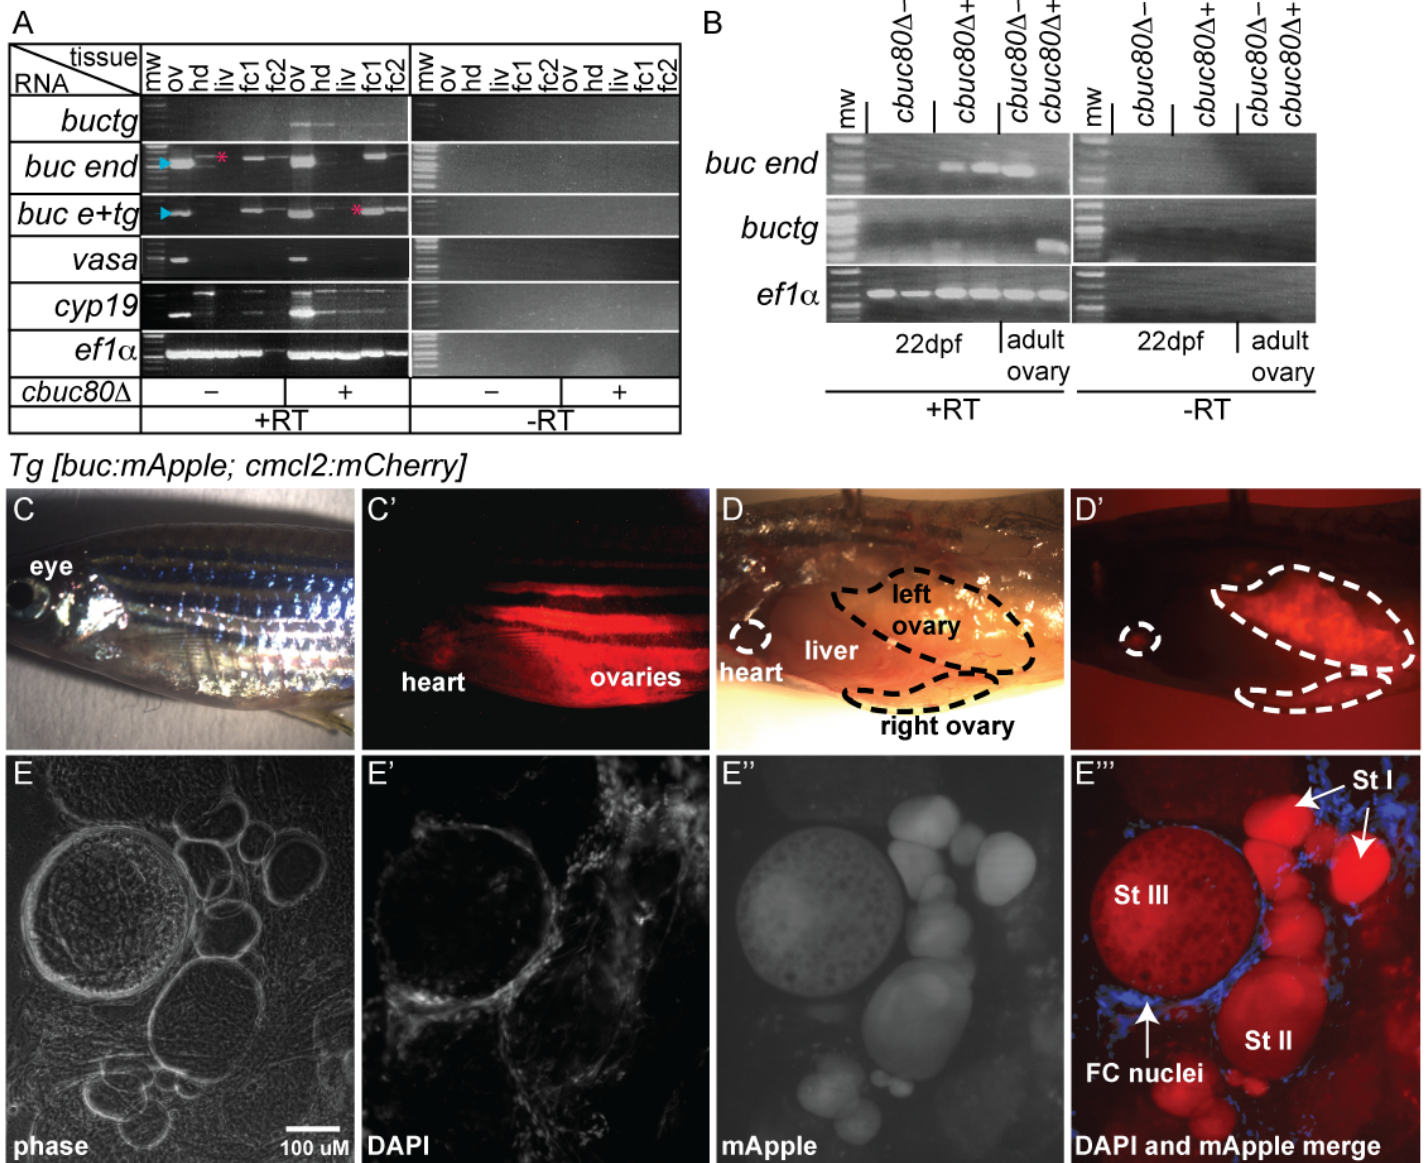

**Figure S1. *bucky ball* promoter drives expression in the germline and transgenic *bucky ball* transcripts show similar expression profiles to endogenous *buc* transcripts.** A) Images of DNA gels show RTPCR products amplified from cDNA (+RT) produced from various tissues of *cbuc80* transgene negative (*cbuc80*<sup>-</sup>) and positive (*cbuc80*<sup>+</sup>) F1 females. -RT indicates negative control for genomic contamination. Molecular weight ladder (mw), ovary (ov), head (hd), liver (liv), follicle cell (fc). *buctg* primers amplify transgenic transcripts, *buc end* primers amplify only endogenous *buc*, *buc e+tg* primers amplify both endogenous and transgenic transcripts. Aqua arrowhead indicates *buc* and pink asterisks indicate a nonspecific band amplified in some tissues (both were verified by sequencing). B) Images of DNA gels show RTPCR products amplified from cDNA (+RT) produced from juvenile and adult ovary of transgene negative (*cbuc80*<sup>-</sup>) and positive (*cbuc80*<sup>+</sup>) F1 females. C-E''') Transgenic F1 female expressing mApple under the control of the *buc* promoter. C-C') Red fluorescent proteins mCherry (heart) and mApple (ovary) detected through the body wall. D-D') *In situ* dissection of the Tg female revealed broad expression of mApple in early-stage oocytes throughout the ovaries. (E-E''') Whole-mount microscopy of dissected ovary demonstrates expression of *buc* promoter in early oocytes (stages I-III) (E''-E'''), but not in adjacent follicle cells (FC) labeled by DAPI (E' and E''').

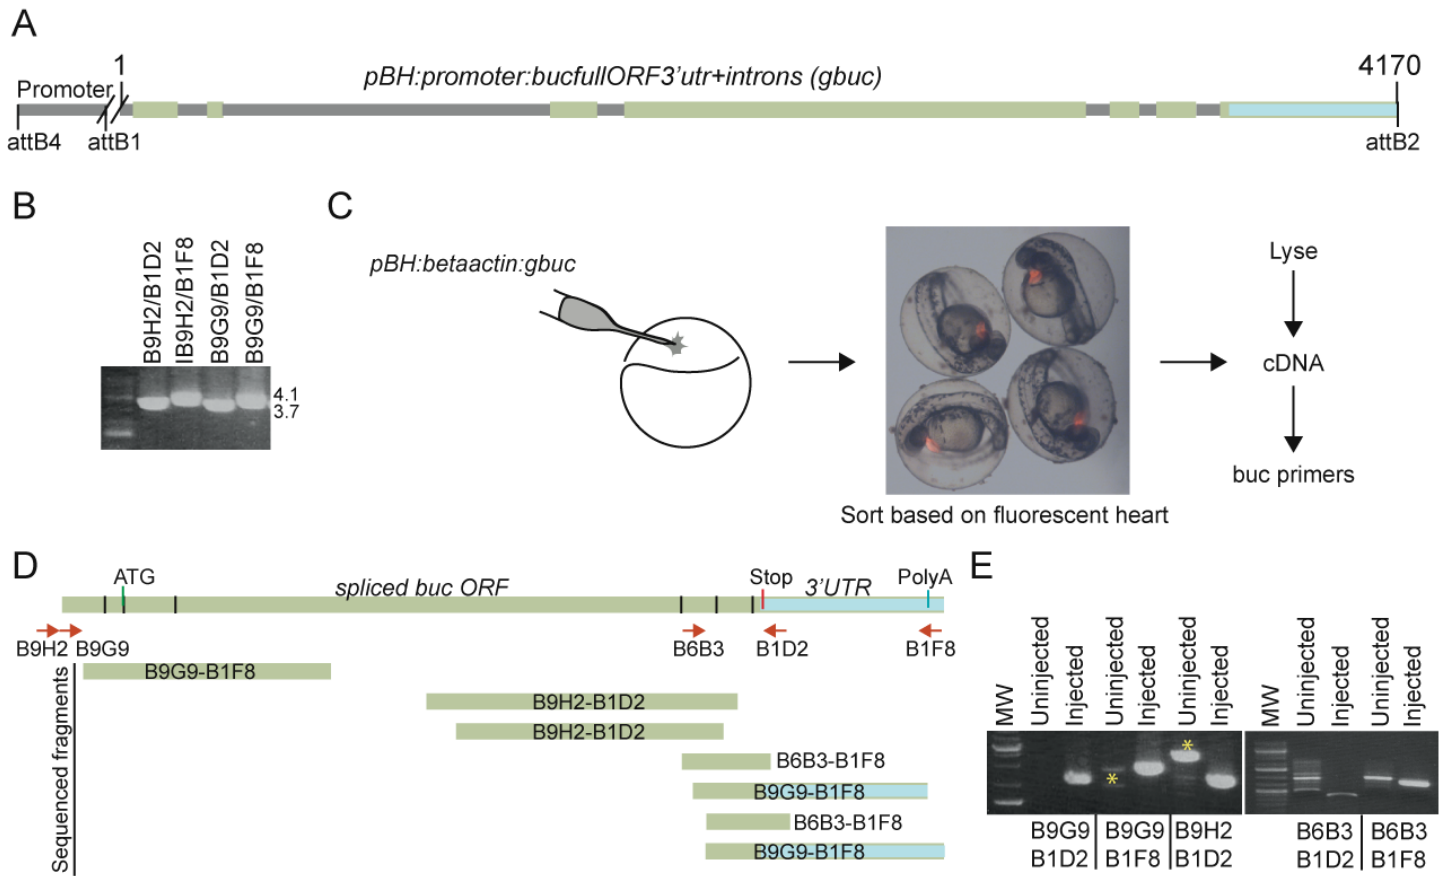

**Figure S2. *bucky ball* constructs comprised of exons and introns are spliced correctly.** A) Schematic of constructs used to generate *bucky ball* transgenics with introns and exons of *bucky ball*. Promoters used were *beta-actin* and *bucky ball*. B) Gels showing PCR products amplified from genomic DNA using primers within the 5'UTR and 3'UTR of the *bucky ball* gene to obtain versions of *buc* with the introns intact and either full length or a truncated 3'UTR. C) Assay for splicing of *buc* plasmids including exons and introns. The *pBH: beta-actin:gbuc* construct was injected into single cell embryos along with transposase RNA. At 2dpf (a stage when endogenous *buc* transcripts are not detected), larvae with the integrated transgene were selected based on their fluorescent hearts and used to generate cDNA to examine the transcripts produced from the *buc+introns* construct. D) Schematic of spliced *buc* obtained from *pBH: beta-actin:gbuc*. E) PCR fragments amplified from cDNA of *pBH:beta-actin:gbuc* expressing embryos were as expected for properly spliced *buc*. Yellow asterisks indicate non-specific products amplified in the absence of *buc* as determined by sequencing.

*Tg[pBH:bucpromoter:gbuc]+*

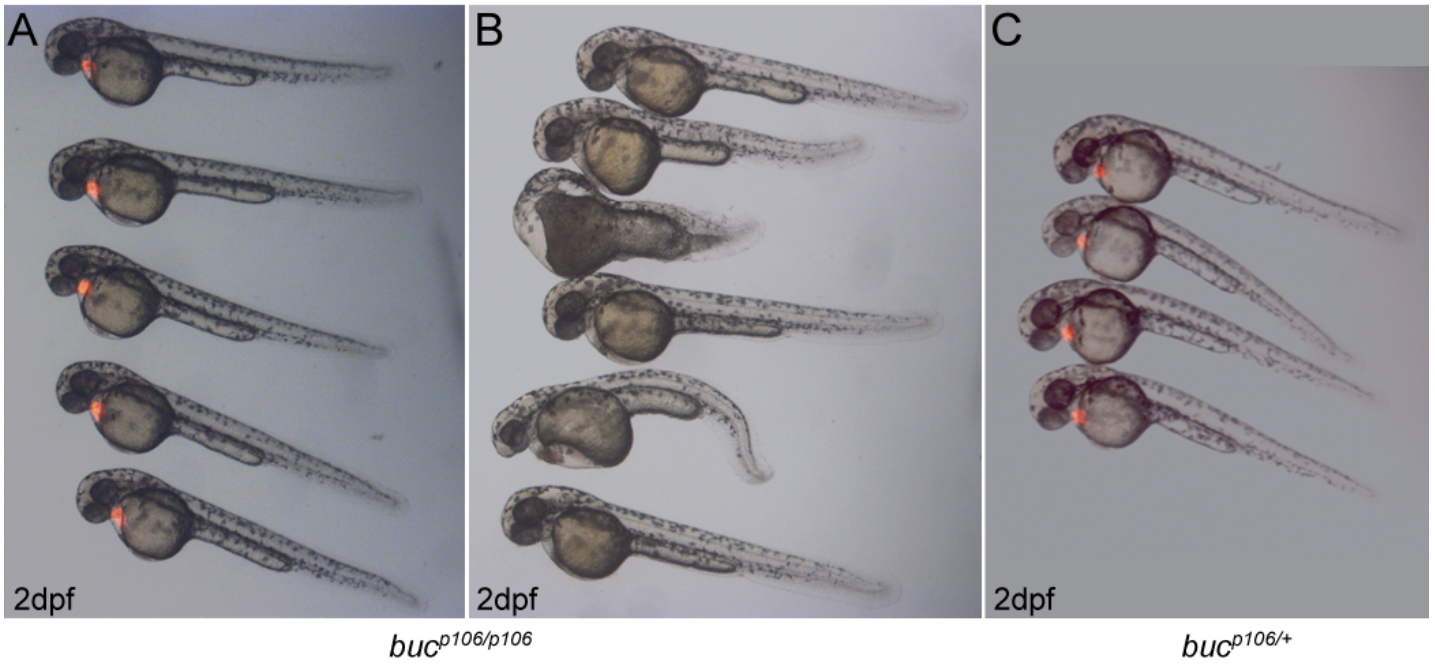

**Figure S3. Progeny of *buc* mutant females are rescued by maternally supplied *buc* with introns.** A-B) F2 embryos of a *bucky ball* mutant female bearing a transgene with the full *buc* coding sequence and introns. A) Half of the rescued progeny express the zygotic bleeding heart (red fluorescent protein in the heart) reporter; B) whereas, the other half do not express the zygotic reporter. C) Progeny of a F1 transgene positive *bucky ball* heterozygote expressing the bleeding heart reporter at 2 days post fertilization (dpf).

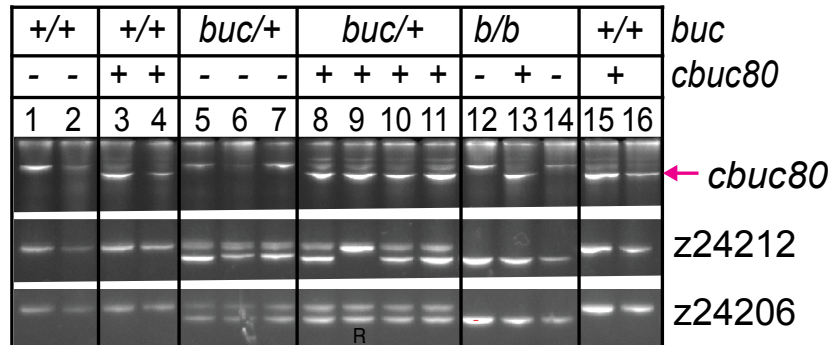

**Figure S4. Representative PCR based genotyping assays.** F1 females were genotyped for the presence of the transgene (arrow), and their genotype at the *buc* locus (*z24212* and *z24206*). The numbers above the gel images correspond to the numbers above the bars in Fig. 3L. R denotes a recombinant fish.

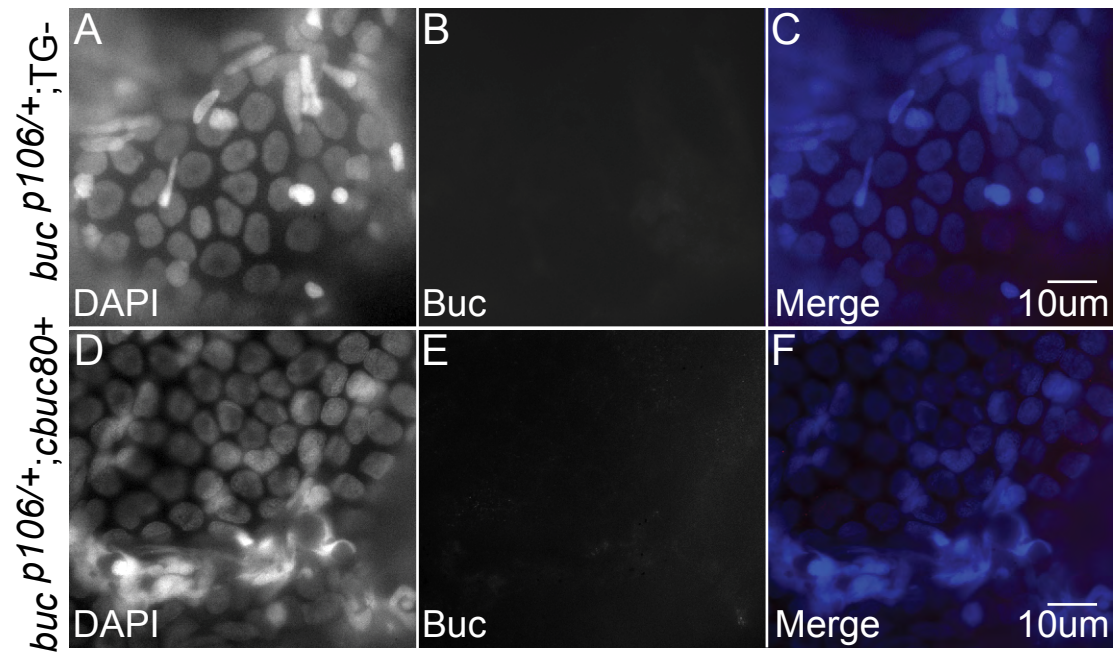

**Figure S5. Buc protein is not detected in somatic follicle cells.** Images of oocytes from *cbuc80* transgenic founder mothers. A-C) transgene negative or D-F) *cbuc80* positive females. 40x apotome images.

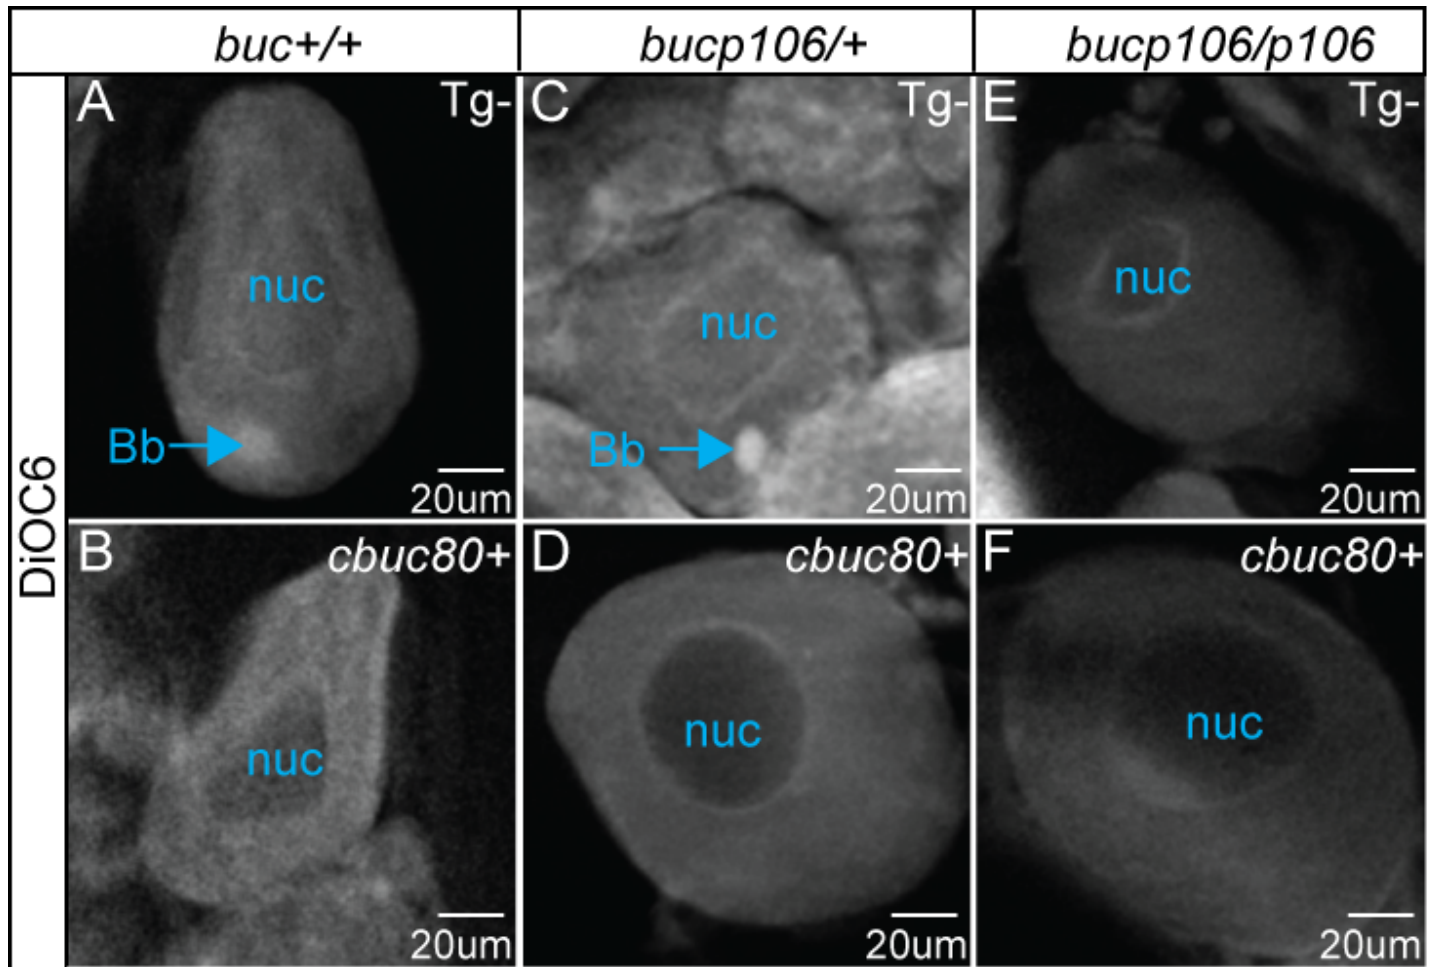

**Figure S6. Ectopic Balbiani body formation requires the 3'UTR.** Images of DiOC6 labeled oocytes from *cbuc80* transgenic F1 mothers. The animal (An) and vegetal (Vg) axes of eggs with normal polarity are marked accordingly. A-F) DiOC6 labels the Balbiani bodies (Bb) of A) homozygous WT and C) *buc<sup>p106/+</sup>* heterozygous females. Bb formation is disrupted in both B) homozygous WT and D) *buc<sup>p106/+</sup>* heterozygous genotypes when the *cbuc80* transgene (Tg) is present and E, F) in *buc<sup>p106/p106</sup>* homozygous mutants regardless of transgene status. Nuc denotes the nucleus. 40x apotome images.

**Table S1. Primers**

| <b>Cloning primers</b>                                            | <b>Sequence</b>                                                    |
|-------------------------------------------------------------------|--------------------------------------------------------------------|
| <i>bucky ball ATG</i>                                             | 5'-ATGGAAGGAATAAATAACAATTCA-3'                                     |
| <i>bucky ball 80bp reverse</i>                                    | 5'-CCATGTGTACATTTATAGTGAAGTGC-3'                                   |
| <i>bucky ball Promoter forward</i>                                | 5'-CAACATGACTTCGGCAGCTA-3'                                         |
| <i>bucky ball Promoter reverse</i>                                | 5'-CTGAACCGTACACACAGAATCC-3'                                       |
| <i>buc 2K prom attB4 F</i>                                        | 5'-<br>GGGGACAACCTTTGTATAGAAAAGTTGATGCTATCCCT<br>GCATTGGTC-3'      |
| <i>buc prom attB1R</i>                                            | 5'-GGGGACTGCTTTTTTTGTACAAACTTGCTGAACCGT<br>ACACACAGAATCC-3'        |
| <i>bucky ball 3'UTR forward</i>                                   | 5'-GAGGGGCAGAGGTTCTATGA-3'                                         |
| <i>bucky ball 3'UTR reverse</i>                                   | 5'-GCAATGCGGAAACTTTAATGA-3'                                        |
| <i>bucky ball full3'utr transgene reverse (diagnostic and RT)</i> | 5'-CGAATTCGCCCTTGCAATGCG-3'                                        |
| <i>buc80bpΔ transgene diagnostic (for genomic DNA and RTPCR)</i>  | 5'-<br>AGAAGGTCGACTTGAAAATCAATCCACCAGCAAAGG<br>C<br>CAAGAAGTGAA-3' |
| <i>bucky ball 5'UTR forward</i>                                   | 5'-CGATAGGCCTGTTGGGTAGA -3'                                        |
| <i>bucky ball exon 1 forward</i>                                  | 5'-TGGATCTCTGGAAACAGACG-3'                                         |
| <i>bucky ball exon 5 forward</i>                                  | 5'-GAGAGAGGGGGTTGTGTCTG-3'                                         |
| <i>R4/R2 cassette F</i>                                           | 5'-GTTTAAACGGGCCCTATCAACTTTGTATAG-3'                               |
| <i>R4/R2 cassette R</i>                                           | 5'-TTATCGATAAGCTTACATCAACTTTGTACA-3'                               |
| <i>p106 genotyping- for sequencing (bucintron5/6 F)</i>           | 5'-TGTGTGTGTCTCTGTGTGAAG-3'                                        |
| <b>QRT-PCR primers</b>                                            | <b>Sequence</b>                                                    |
| <i>bucky ball both forward</i>                                    | 5'-CAAGAGCGCCAGAGTGTCTT-3'                                         |
| <i>bucky ball both reverse</i>                                    | 5'-CCATGTGTACATTTATAGTGAAGTGC-3'                                   |
| <i>bucky ball endogenous forward</i>                              | 5'AGAAGGTCGACTTGAAAATCAATCCACCAGCAAAG<br>GCCAAGAAGTGAA-3'          |
| <i>bucky ball endogenous reverse</i>                              | 5'-GCAATGCGGAAACTTTAATGA-3'                                        |
| <i>bucky ball80Δ transgene reverse</i>                            | 5'-GAATTCGCCCTTCCATGT-3'                                           |
| <i>EF1alpha forward</i>                                           | 5'-AGCCTGGTATGGTTGTGACCTTCG-3'                                     |
| <i>EF1alpha reverse</i>                                           | 5'-CCAAGTTGTTTTCTTTCTGCG-3'                                        |
| <i>vasa forward</i>                                               | 5'-GTGGAAAGATTGGCCTGAGTAA-3'                                       |

|                           |                                                               |
|---------------------------|---------------------------------------------------------------|
| <i>vasa reverse</i>       | 5'-CAAGGCGAAAATCACTGAGAG -3'                                  |
| <b>RNA IP primers</b>     |                                                               |
| <i>dazl forward</i>       | 5'-ATGGTTCAGGGGGTTCAGTTACC-3'                                 |
| <i>dazl reverse</i>       | 5'-CTACATAAGGGTTAGCAAAGTCTGCAC-3'                             |
| <i>bucky ball forward</i> | 5'-GAGGGGCAGAGGTTCTATGA-3'                                    |
| <i>bucky ball reverse</i> | 5'-GCAATGCGGAAACTTTAATGA-3'                                   |
| <i>vasa forward</i>       | 5'-GTGGAAAGATTGGCCTGAGTAA-3'                                  |
| <i>vasa reverse</i>       | 5'-CAAGGCGAAAATCACTGAGAG -3'                                  |
| <i>nanos forward</i>      | 5'-AGCGGACATTGATGCTCCG-3'                                     |
| <i>nanos reverse</i>      | 5'-CACAGGAAACAGCTATGACCATGA-3'                                |
| <b>Y2H baits and prey</b> | <b>Sequence</b>                                               |
| <i>bucforBaitF</i>        | 5'-ATGGAAGGAATAAATAACAATTCA-3'                                |
| <i>bucforBaitΔ1-252F</i>  | 5'-AGCCAAAATGAAATGTCTGTCTGC-3'                                |
| <i>bucforBaitR</i>        | 5'-CCATGTGTACATTTATAGTGAAGTGC-3'                              |
| <i>bucforBaitΔ1-386F</i>  | 5'-CAAGAGCGCCAGAGTGTCTT-3'                                    |
| <i>bucAccl_F</i>          | 5'-<br>CGAGAGATTGACCCACTTGTCTCGACTTGTAATCAA<br>TCCA<br>CC-3'  |
| <i>bucAccl_R</i>          | 5'-<br>GGTGGATTGATTTACAAGTCGAGACAAGTGGGTCAAT<br>C<br>TCTCG-3' |
| <i>bucSmaDra_F</i>        | 5'-<br>CCAAATTAGAGTCTTCGTTTCCGGGAAAACCGTAATG<br>GCC-3'        |
| <i>bucSmaDra_R</i>        | 5'-<br>GGCCATTACGGTTTTCCCGGAAACGAAGACTCTAATT<br>TGGA<br>GG-3' |
| <i>rbpmsGWY2Hatg</i>      | 5'-ATGAGTGTCAAGTCCGACTC-3'                                    |
| <i>rbpmsGWY2Hstop</i>     | 5'-TTAACAGAACTGTCGGGATTTCC-3'                                 |
